# Supplementary material
Source: HighWire-hosted journal article supplement (https://cmajopen.ca/highwire/filestream/89697/field_highwire_adjunct_files/1/open-2022-0130-2-at.pdf)
Supplement: open-2022-0130-2-at.pdf [file open-2022-0130-2-at.pdf]

## Appendix B. Electronic search strategies

Health Equity – Guideline Processes

Final Strategies

2020 Nov 23

Ovid Multifile

Database: Embase Classic+Embase <1947 to 2020 November 20> , Ovid MEDLINE(R) ALL <1946 to November 20, 2020>

Search Strategy:

- 1 ((guideline? or clinical practice guideline? or CPG or CPGs or evidence-based guideline?) adj5 (deprivation\* or deprive or deprived or deprives or depriving or disadvantag\* or disparit\* or equalit\* or equit\* or fair or fairness\* or inequit\* or impoverish\* or inequalit\* or insecurit\* or marginal\* or poverty or underserv\* or unfair\* or vulnerab\*)).tw,kf. (1986)
- 2 ((guideline? or clinical practice guideline? or CPG or CPGs or evidence-based guideline? or guidance? or standards or consensus\* or recommendat\* or practice parameter\* or position statement\* or policy statement\*) and (deprivation\* or deprive or deprived or deprives or depriving or disadvantag\* or disparit\* or equalit\* or equit\* or fair or fairness\* or inequit\* or impoverish\* or inequalit\* or insecurit\* or marginal\* or poverty or underserv\* or unfair\* or vulnerab\*)).ti,kf. (1708)
- 3 exp Guidelines as Topic/ (737428)
- 4 ((guideline? or clinical practice guideline? or CPG or CPGs or evidence-based guideline?) adj5 (develop\* or establish\* or ethic\* or framework? or implement\* or method\* or organis\* or organiz\* or process\* or strateg\*)).tw,kf. (172902)
- 5 ((guideline? or clinical practice guideline? or CPG or CPGs or evidence-based guideline? or guidance? or standards or consensus\* or recommendat\* or practice parameter\* or position statement\* or policy statement\*) and (develop\* or establish\* or ethic\* or framework? or implement\* or method\* or organis\* or organiz\* or process\* or strateg\*)).ti,kf. (53504)
- 6 1 or 2 [GUIDELINE - EQUITY] (3344)
- 7 or/3-5 [GUIDELINES AS TOPIC/PROCESSES, ETC.] (868820)
- 8 6 and 7 [GUIDELINE - EQUITY - PROCESSES, ETC.] (1580)
- 9 exp Animals/ not Humans/ (18432863)
- 10 8 not 9 [ANIMAL-ONLY REMOVED] (1151)
- 11 (comment or editorial or news or newspaper article).pt. (2137328)
- 12 (letter not (letter not randomized controlled trial)).pt. (5352)
- 13 10 not (11 not 12) [OPINION PIECES REMOVED] (1125)
- 14 limit 13 to yr="2010-current" (800)
- 15 14 use medall [MEDLINE RECORDS] (475)
- 16 ((guideline? or clinical practice guideline? or CPG or CPGs or evidence-based guideline?) adj5 (deprivation\* or deprive or deprived or deprives or depriving or disadvantag\* or disparit\* or equalit\* or equit\* or fair or fairness\* or inequit\* or impoverish\* or inequalit\* or insecurit\* or marginal\* or poverty or underserv\* or unfair\* or vulnerab\*)).tw,kw. (2012)
- 17 ((guideline? or clinical practice guideline? or CPG or CPGs or evidence-based guideline? or guidance? or standards or consensus\* or recommendat\* or practice parameter\* or position statement\* or policy statement\*) and (deprivation\* or deprive or deprived or deprives or depriving or disadvantag\* or disparit\* or equalit\* or equit\* or fair or fairness\* or inequit\* or impoverish\* or inequalit\* or insecurit\* or marginal\* or poverty or underserv\* or unfair\* or vulnerab\*)).ti,kw. (2031)
- 18 ((guideline? or clinical practice guideline? or CPG or CPGs or evidence-based guideline?) adj5 (develop\* or establish\* or ethic\* or framework? or implement\* or method\* or organis\* or organiz\* or process\* or strateg\*)).tw,kw. (173345)
- 19 ((guideline? or clinical practice guideline? or CPG or CPGs or evidence-based guideline? or guidance? or standards or consensus\* or recommendat\* or practice parameter\* or position statement\* or policy statement\*) and (develop\* or establish\* or ethic\* or framework? or implement\* or method\* or organis\* or organiz\* or process\* or strateg\*)).ti,kw. (59911)
- 20 16 or 17 [GUIDELINE - EQUITY] (3655)
- 21 18 or 19 [GUIDELINES AS TOPIC/PROCESSES, ETC.] (211483)
- 22 20 and 21 [GUIDELINE - EQUITY - PROCESSES, ETC.] (927)
- 23 exp animal/ or exp animal experimentation/ or exp animal model/ or exp animal experiment/ or nonhuman/ or exp vertebrate/ (54107096)
- 24 exp human/ or exp human experimentation/ or exp human experiment/ (41925790)
- 25 23 not 24 (12183115)
- 26 22 not 25 [ANIMAL-ONLY REMOVED] (914)

Appendix 2, as supplied by the authors. Appendix to: Shaver N, Bennett A, Beck A, et al. Health equity considerations in guideline development: a rapid scoping review. *CMAJ Open* 2023. doi: 10.9778/cmajo.20220130. Copyright © 2023 The Author(s) or their employer(s).

To receive this resource in an accessible format, please contact us at [cmajgroup@cmaj.ca](mailto:cmajgroup@cmaj.ca).

- 27 editorial.pt. (1224913)
- 28 letter.pt. not (letter.pt. not randomized controlled trial/) (10844)
- 29 26 not (27 not 28) [OPINION PIECES REMOVED] (908)
- 30 limit 29 to yr="2010-current" (687) [TOTAL UNIQUE RECORDS]
- 31 30 use emczd [EMBASE RECORDS] (421)
- 32 15 or 31 [BOTH DATABASES] (896)
- 33 remove duplicates from 32 (621) [TOTAL UNIQUE RECORDS]
- 34 33 use medall [MEDLINE UNIQUE RECORDS] (474)
- 35 33 use emczd [EMBASE UNIQUE RECORDS] (147)

\*\*\*\*\*

CINAHL

| #   | Query                  | Limiters/Expanders                                                                                                                                                   | Last Run Via                                                                               | Results |
|-----|------------------------|----------------------------------------------------------------------------------------------------------------------------------------------------------------------|--------------------------------------------------------------------------------------------|---------|
| S11 | S8 NOT S9              | Limiters - Published Date: 20100101-20201231; Exclude MEDLINE records<br>Expanders - Apply related words; Apply equivalent subjects<br>Search modes - Boolean/Phrase | Interface - EBSCOhost Research Databases Search Screen - Advanced Search Database - CINAHL | 560     |
| S10 | S8 NOT S9              | Limiters - Published Date: 20100101-20201231<br>Expanders - Apply related words; Apply equivalent subjects<br>Search modes - Boolean/Phrase                          | Interface - EBSCOhost Research Databases Search Screen - Advanced Search Database - CINAHL | 1,275   |
| S9  | PT editorial or letter | Limiters - Published Date: 20100101-20201231<br>Expanders - Apply related words; Apply equivalent subjects<br>Search modes - Boolean/Phrase                          | Interface - EBSCOhost Research Databases Search Screen - Advanced Search Database - CINAHL | 220,872 |
| S8  | S3 AND S6              | Limiters - Published Date: 20100101-20201231<br>Expanders - Apply related words; Apply equivalent subjects<br>Search modes - Boolean/Phrase                          | Interface - EBSCOhost Research Databases Search Screen - Advanced Search Database - CINAHL | 1,293   |
| S7  | S3 AND S6              | Expanders - Apply related words; Apply equivalent subjects<br>Search modes - Boolean/Phrase                                                                          | Interface - EBSCOhost Research Databases Search Screen - Advanced Search                   | 1,683   |

|    |                                                                                                                                                                                                                                                                                                                                                                                                                                                                                                                                                                                                                                       |                                                                                             |                                                                                                     |        |
|----|---------------------------------------------------------------------------------------------------------------------------------------------------------------------------------------------------------------------------------------------------------------------------------------------------------------------------------------------------------------------------------------------------------------------------------------------------------------------------------------------------------------------------------------------------------------------------------------------------------------------------------------|---------------------------------------------------------------------------------------------|-----------------------------------------------------------------------------------------------------|--------|
|    |                                                                                                                                                                                                                                                                                                                                                                                                                                                                                                                                                                                                                                       |                                                                                             | Database - CINAHL                                                                                   |        |
| S6 | S4 OR S5                                                                                                                                                                                                                                                                                                                                                                                                                                                                                                                                                                                                                              | Expanders - Apply related words; Apply equivalent subjects<br>Search modes - Boolean/Phrase | Interface - EBSCOhost<br>Research Databases<br>Search Screen - Advanced Search<br>Database - CINAHL | 66,266 |
| S5 | TI (guideline# or "clinical practice guideline" or "clinical practice guidelines" or CPG or CPGs or "evidence-based guideline" or "evidence-based guidelines" or guidance# or standards or consensus* or recommendat* or "practice parameter" or "practice parameters" or "position statement" or "position statements" or "policy statement" or "policy statements") AND (develop* or establish* or ethic* or framework# or implement* or method* or organis* or organiz* or process* or strateg*)                                                                                                                                   | Expanders - Apply related words; Apply equivalent subjects<br>Search modes - Boolean/Phrase | Interface - EBSCOhost<br>Research Databases<br>Search Screen - Advanced Search<br>Database - CINAHL | 46,909 |
| S4 | TI ( ( guideline# or "clinical practice guideline" or "clinical practice guidelines" or CPG or CPGs or "evidence-based guideline" or "evidence-based guidelines") N5 (develop* or establish* or ethic* or framework# or implement* or method* or organis* or organiz* or process* or strateg*) ) OR AB ( ( guideline# or "clinical practice guideline" or "clinical practice guidelines" or CPG or CPGs or "evidence-based guideline" or "evidence-based guidelines") N5 (develop* or establish* or ethic* or framework# or implement* or method* or organis* or organiz* or process* or strateg*) )                                  | Expanders - Apply related words; Apply equivalent subjects<br>Search modes - Boolean/Phrase | Interface - EBSCOhost<br>Research Databases<br>Search Screen - Advanced Search<br>Database - CINAHL | 29,491 |
| S3 | S1 OR S2                                                                                                                                                                                                                                                                                                                                                                                                                                                                                                                                                                                                                              | Expanders - Apply related words; Apply equivalent subjects<br>Search modes - Boolean/Phrase | Interface - EBSCOhost<br>Research Databases<br>Search Screen - Advanced Search<br>Database - CINAHL | 2,489  |
| S2 | TI (guideline# or "clinical practice guideline" or "clinical practice guidelines" or CPG or CPGs or "evidence-based guideline" or "evidence-based guidelines" or guidance# or standards or consensus* or recommendat* or "practice parameter" or "practice parameters" or "position statement" or "position statements" or "policy statement" or "policy statements") AND (deprivation* or deprive or deprived or deprives or depriving or disadvantag* or disparit* or equalit* or equit* or fair or fairness* or inequit* or impoverish* or inequalit* or insecurit* or marginal* or poverty or underserv* or unfair* or vulnerab*) | Expanders - Apply related words; Apply equivalent subjects<br>Search modes - Boolean/Phrase | Interface - EBSCOhost<br>Research Databases<br>Search Screen - Advanced Search<br>Database - CINAHL | 2,175  |
| S1 | TI ( ( guideline# or "clinical practice guideline" or "clinical practice guidelines" or CPG or CPGs or "evidence-based guideline" or "evidence-based guidelines") N5 (deprivation* or deprive or deprived or deprives or depriving or disadvantag* or disparit* or equalit* or                                                                                                                                                                                                                                                                                                                                                        | Expanders - Apply related words; Apply equivalent subjects<br>Search modes - Boolean/Phrase | Interface - EBSCOhost<br>Research Databases<br>Search Screen                                        | 516    |

|                                                                                                                                                                                                                                                                                                                                                                                                                                                                                                                                                                                                   |  |                                            |  |
|---------------------------------------------------------------------------------------------------------------------------------------------------------------------------------------------------------------------------------------------------------------------------------------------------------------------------------------------------------------------------------------------------------------------------------------------------------------------------------------------------------------------------------------------------------------------------------------------------|--|--------------------------------------------|--|
| <p>equit* or fair or fairness* or inequit* or impoverish* or inequalit* or insecurit* or marginal* or poverty or underserv* or unfair* or vulnerab* ) ) OR AB ( (guideline# or "clinical practice guideline" or "clinical practice guidelines" or CPG or CPGs or "evidence-based guideline" or "evidence-based guidelines") N5 (deprivation* or deprive or deprived or deprives or depriving or disadvantag* or disparit* or equalit* or equit* or fair or fairness* or inequit* or impoverish* or inequalit* or insecurit* or marginal* or poverty or underserv* or unfair* or vulnerab* ) )</p> |  | <p>- Advanced Search Database - CINAHL</p> |  |
|---------------------------------------------------------------------------------------------------------------------------------------------------------------------------------------------------------------------------------------------------------------------------------------------------------------------------------------------------------------------------------------------------------------------------------------------------------------------------------------------------------------------------------------------------------------------------------------------------|--|--------------------------------------------|--|

Web of Science

- # 9 [392](#) #6 AND #3  
**Refined by: PUBLICATION YEARS:** ( 2020 OR 2019 OR 2018 OR 2017 OR 2016 OR 2015 OR 2014 OR 2013 OR 2012 OR 2011 OR 2010 ) AND [excluding] **DOCUMENT TYPES:** ( EDITORIAL MATERIAL OR LETTER OR NEWS ITEM )  
 Indexes=SCI-EXPANDED, SSCI, A&HCI, CPCI-S, CPCI-SSH, ESCI Timespan=All years
- # 8 [403](#) #6 AND #3  
**Refined by: PUBLICATION YEARS:** ( 2020 OR 2019 OR 2018 OR 2017 OR 2016 OR 2015 OR 2014 OR 2013 OR 2012 OR 2011 OR 2010 )  
 Indexes=SCI-EXPANDED, SSCI, A&HCI, CPCI-S, CPCI-SSH, ESCI Timespan=All years
- # 7 [551](#) #6 AND #3  
 Indexes=SCI-EXPANDED, SSCI, A&HCI, CPCI-S, CPCI-SSH, ESCI Timespan=All years
- # 6 [136,280](#) #5 OR #4  
 Indexes=SCI-EXPANDED, SSCI, A&HCI, CPCI-S, CPCI-SSH, ESCI Timespan=All years
- # 5 [49,731](#) **TITLE:** ((guideline or guidelines or "clinical practice guideline" or "clinical practice guidelines" or CPG or CPGs or "evidence-based guideline" or "evidence-based guidelines" or guidance\* or standards or consensus\* or recommendat\* or "practice parameter" or "practice parameters" or "position statement" or "position statements" or "policy statement" or "policy statements") AND (develop\* or establish\* or ethic\* or framework\* or implement\* or method\* or organis\* or organiz\* or process\* or strateg\*))  
 Indexes=SCI-EXPANDED, SSCI, A&HCI, CPCI-S, CPCI-SSH, ESCI Timespan=All years
- # 4 [98,448](#) **TOPIC:** ((guideline or guidelines or "clinical practice guideline" or "clinical practice guidelines" or CPG or CPGs or "evidence-based guideline" or "evidence-based guidelines") NEAR/5 (develop\* or establish\* or ethic\* or framework\* or implement\* or method\* or organis\* or organiz\* or process\* or strateg\*))  
 Indexes=SCI-EXPANDED, SSCI, A&HCI, CPCI-S, CPCI-SSH, ESCI Timespan=All years
- # 3 [3,048](#) #2 OR #1  
 Indexes=SCI-EXPANDED, SSCI, A&HCI, CPCI-S, CPCI-SSH, ESCI Timespan=All years
- # 2 [1,914](#) **TITLE:** ((guideline or guidelines or "clinical practice guideline" or "clinical practice guidelines" or CPG or CPGs or "evidence-based guideline" or "evidence-based guidelines" or guidance\* or standards or consensus\* or recommendat\* or "practice parameter" or "practice parameters" or "position statement" or "position statements" or "policy statement" or "policy statements") AND (deprivation\* or deprive or deprived or deprives or depriving or disadvantag\* or disparit\* or equalit\* or equit\* or fair or fairness\* or inequit\* or impoverish\* or inequalit\* or insecurit\* or marginal\* or poverty or underserv\* or unfair\* or vulnerab\*))  
 Indexes=SCI-EXPANDED, SSCI, A&HCI, CPCI-S, CPCI-SSH, ESCI Timespan=All years
- # 1 [1,409](#) **TOPIC:** ((guideline or guidelines or "clinical practice guideline" or "clinical practice guidelines" or CPG or CPGs or "evidence-based guideline" or "evidence-based guidelines") NEAR/5 (deprivation\* or deprive or deprived or deprives or depriving or disadvantag\* or disparit\* or equalit\* or equit\* or fair or fairness\* or inequit\* or impoverish\* or inequalit\* or insecurit\* or marginal\* or poverty or underserv\* or unfair\* or vulnerab\*))  
 Indexes=SCI-EXPANDED, SSCI, A&HCI, CPCI-S, CPCI-SSH, ESCI Timespan=All years
